# Supplementary material
Source: MDPI journal article supplement (https://www.mdpi.com/1999-4907/8/8/289)
Supplement: s1 [file s1]

**
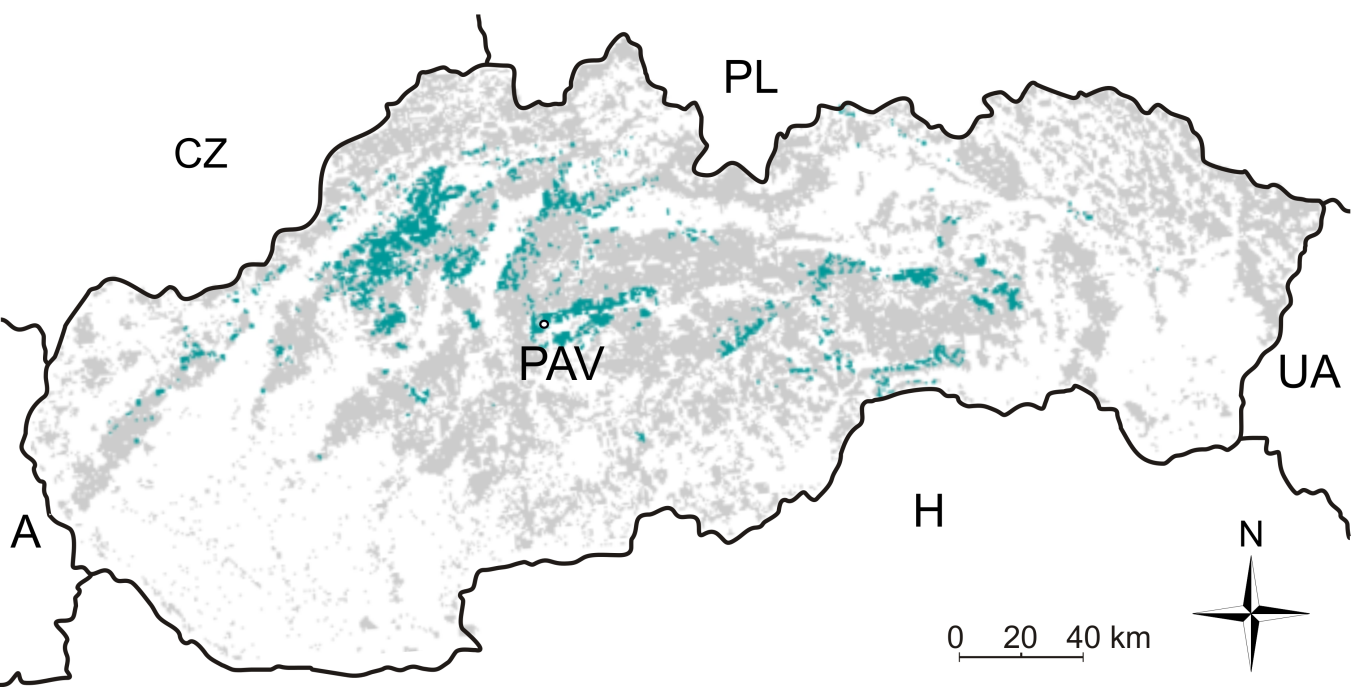
**

**Figure S1.** Location of the study area, Pavelcovo (PAV, Starohorské Mts.) in Slovakia; the limestone beech forests are in green, representing approximately 3.7% of the forest area, and the total forest cover of Slovakia is in grey. Limestone beech forests are present in natural distribution in areas where European yew trees exhibit the top growth performance.


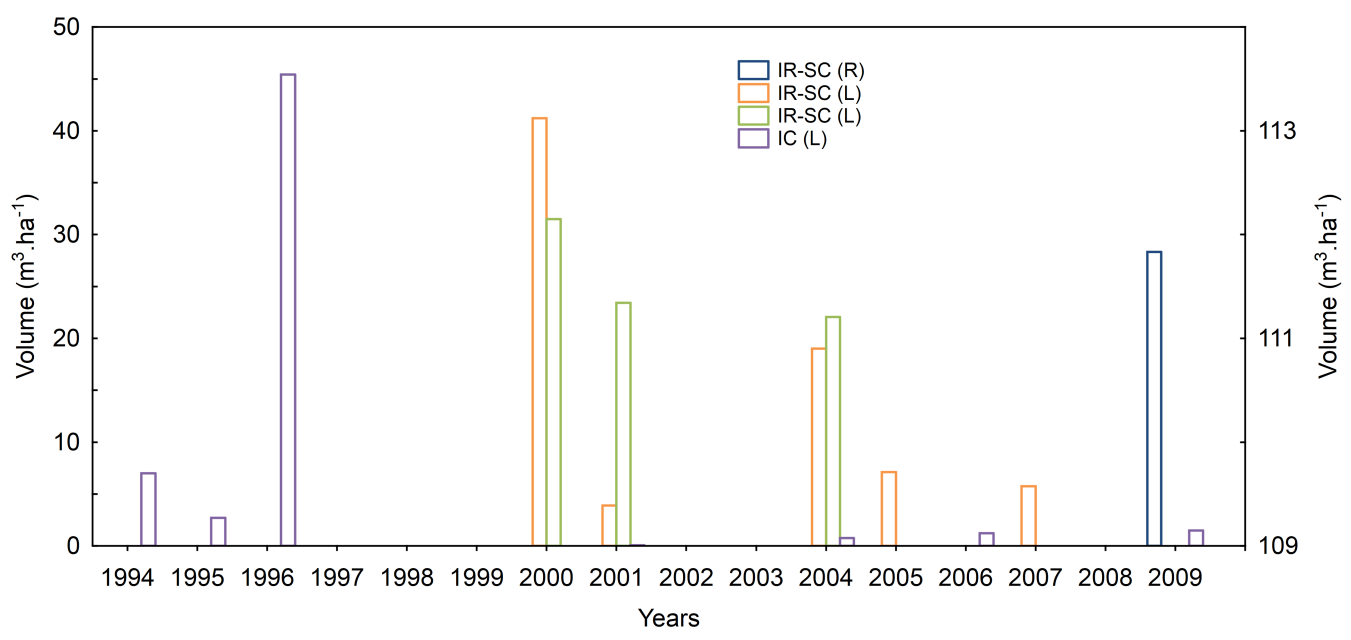


**Figure S2.** Stem volume cuttings removed from the stand calculated per hectare for all tree species other than yew; records available since 1990. IR-SC means irregular shelterwood cut interventions, IC refers to incidental cuttings.


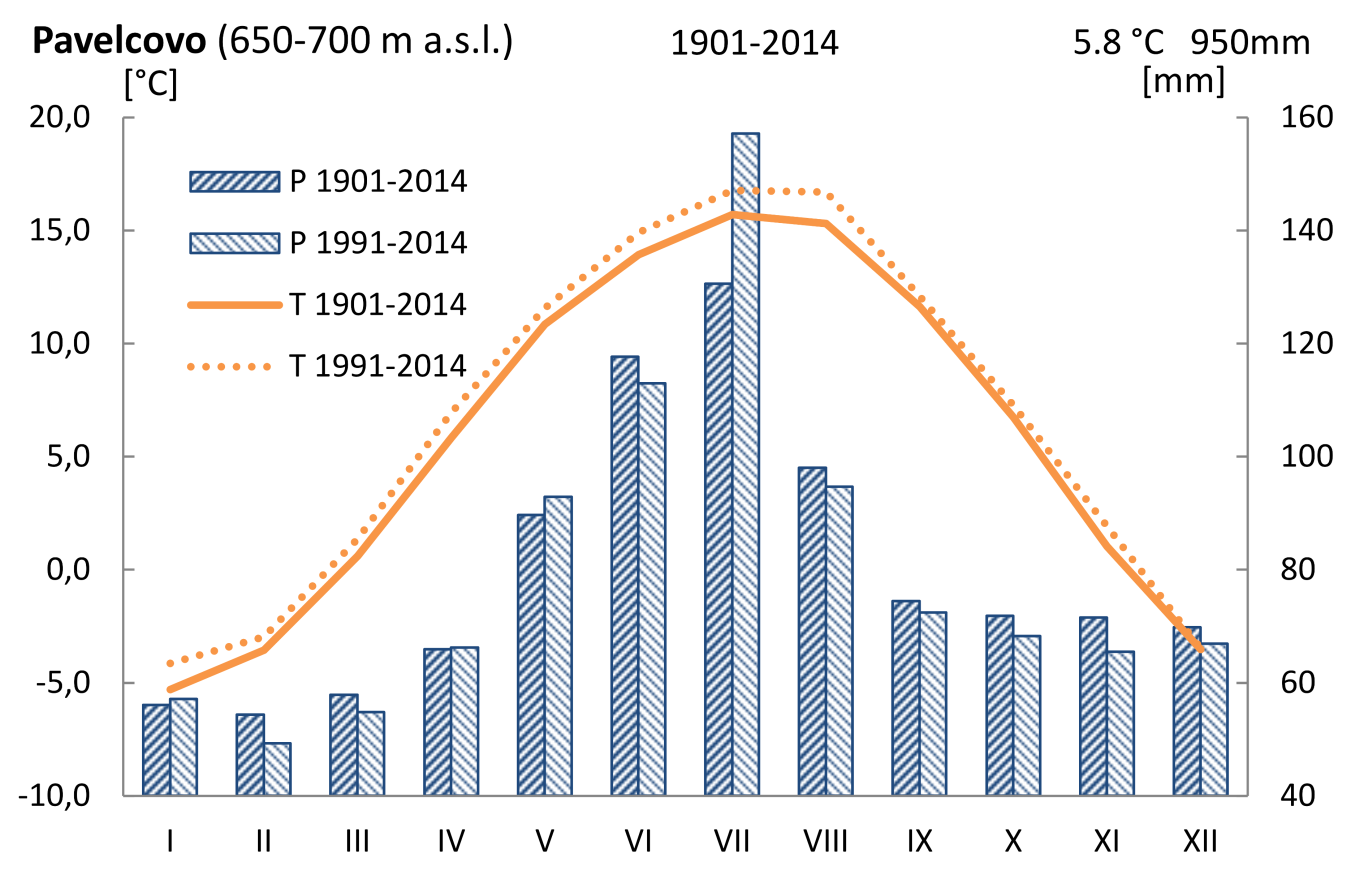


**Figure S3**. Climate diagram with mean monthly precipitation sums (mm) and temperatures (°C) over the periods of 1901–2014 and 1991–2014 in the study area Pavelcovo. Ddata downloaded from CRU TS3.23 - 0.5˚ × 0.5˚ grid interpolated points.

**
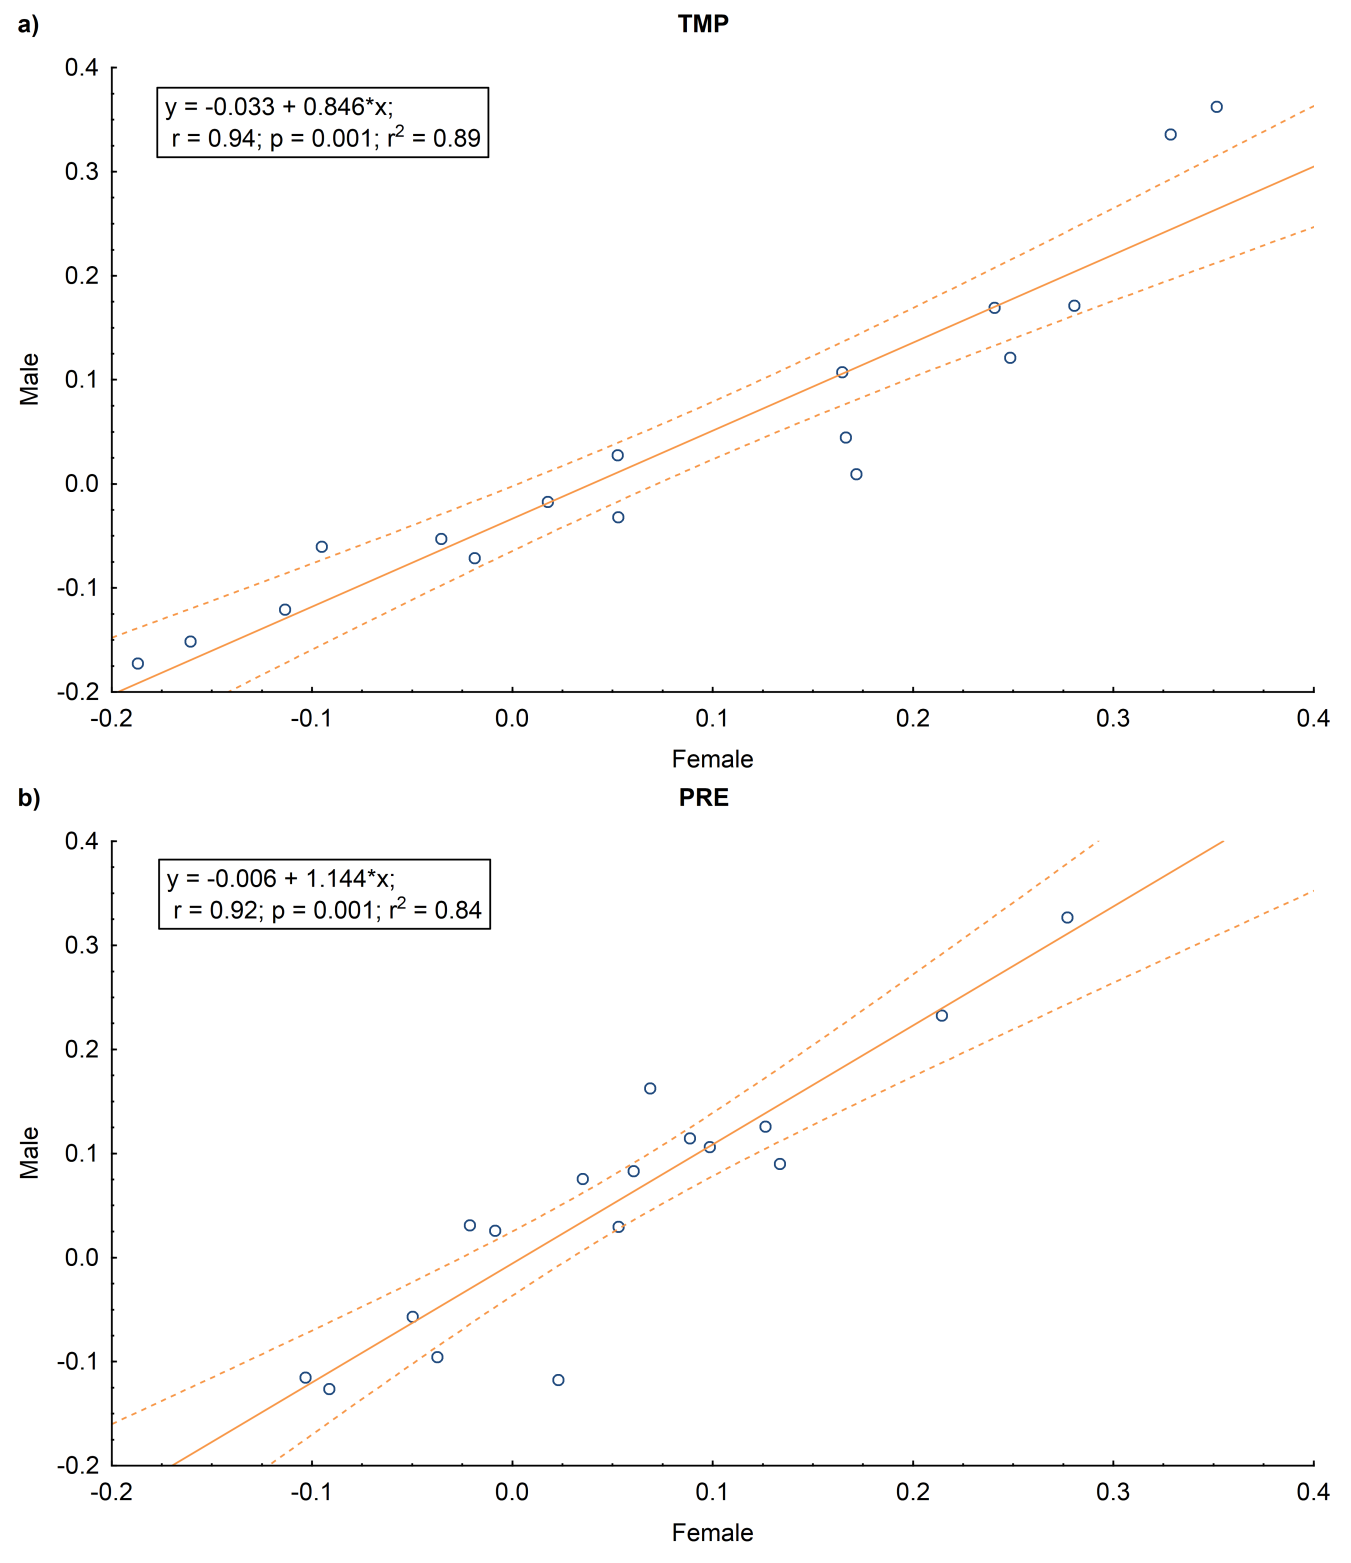
**

**Figure S4.** Strong linear relationship between correlation coefficient values illustrating uniform (no sex–specific) response of residual ring width indexes to variations in (**a**) monthly mean temperature values and (**b**) monthly mean precipitation sums of female and male individuals.


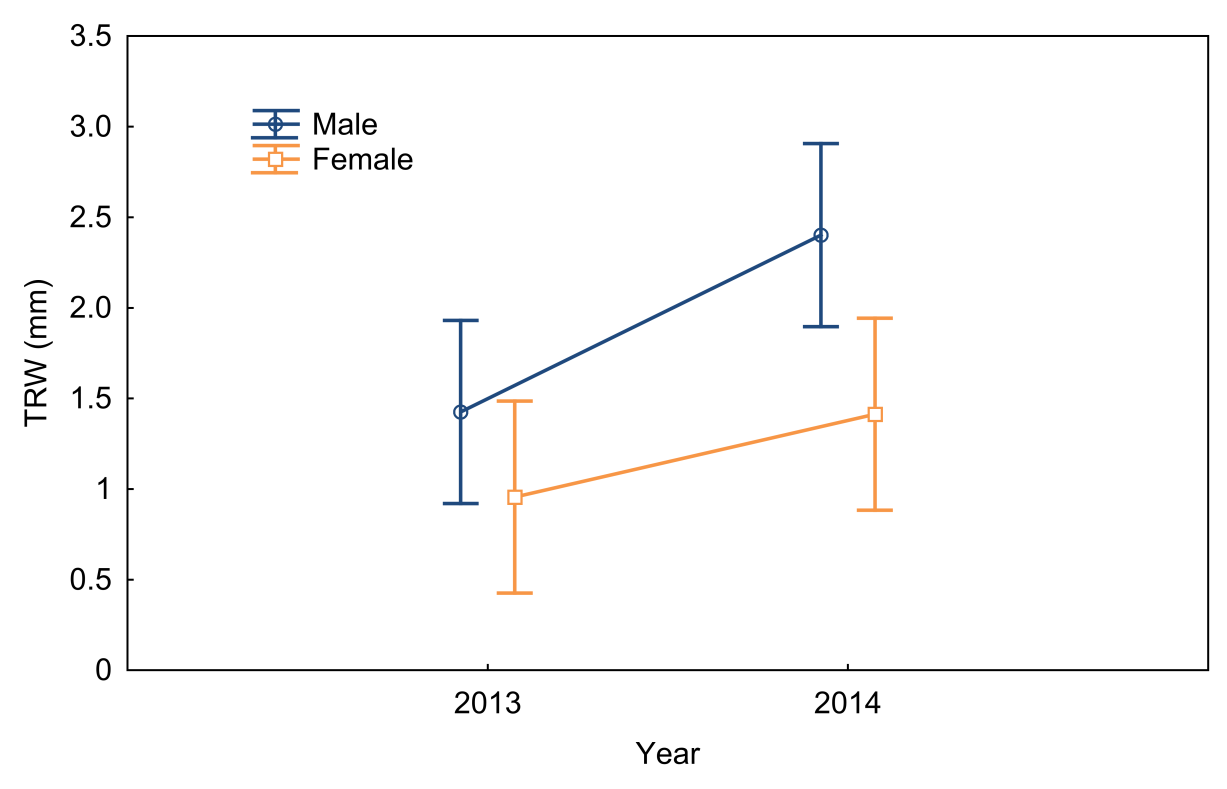


**Figure S5.** Mean tree-ring width (TRW) values between years and sex of yew trees in 2013 and 2014. Vertical bars mark 0.95 confidence intervals.


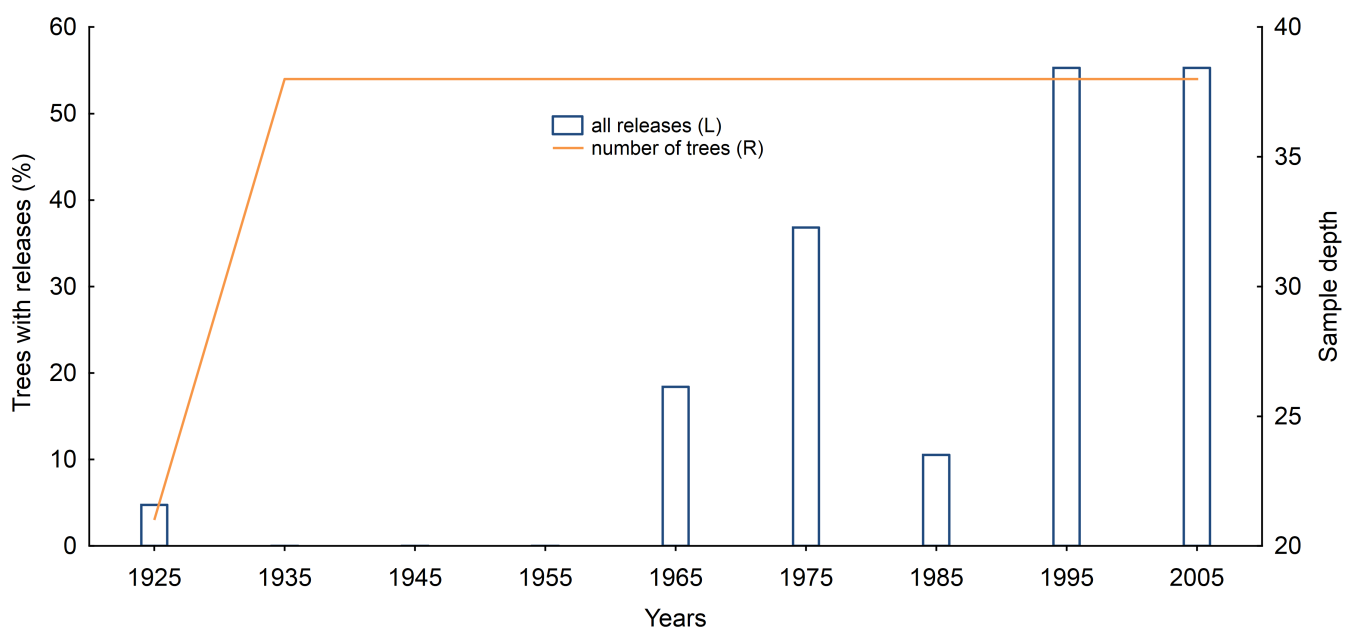


**Figure S6.** Chronology of yew trees showing releases from suppression (releases grouped in 10–year intervals).

**Table S1.** Description of the investigated sites.

| Yew stand characteristics | | Min | Mean ± SD | Max | Mean ± SD | Mean ± SD |
| --- | --- | --- | --- | --- | --- | --- |
|  | | | | | Female | Male |
| Basal area | G (m2.ha-1) | 0.59 | 2.14 ± 1.28 | 3.91 | 2.09 ± 1.18 | 2.17 ± 1.45 |
| Volume | V (m3.ha-1) | 2.49 | 9.36 ± 6.44 | 18.67 | 9.57 ± 6.38 | 9.18 ± 7.00 |
| Stem density | N (ha-1) | 20 | 71 ± 41 | 160 | 77 ± 43 | 67 ± 46 |
| Site characteristics | | | | |  |  |
| Altitude | Alt (m) | 641 | 676 ± 18 | 717 | 676 ± 18.3 | 676 ± 19.0 |
| Exposition | Exp (°) | 30 | 154 ± 48 | 210 | 155 ± 54.3 | 166 ± 59.1 |
| Slope inclination | Inc (°) | 7.3 | 16.2 ± 5.8 | 28 | 16.8 ± 6.2 | 16.6 ± 6.1 |

**Table S2.**  Abbreviations, symbols, and formulae of tree crown variables.

| Symbol | Unit | Description | Formula |
| --- | --- | --- | --- |
| h | m | Total tree height | Measured |
| hCB | m | Height to the base of the crown | Measured |
| CD | m | Crown diameter | Measured |
| CL | m | Crown lenght |  |
| CW | m | Crown width |  |
| CR | m | Crown ratio |  |
| CV | m3 | Crown volume |  |
| CSA | m2 | Crown surface area |  |
| CPA | m2 | Crown projection area |  |
